# Supplementary material
Source: publisher site journal article supplement (https://www.dovepress.com/article/481393)
Supplement: Supplementary file 1 [file get_supplementary_file.php]

**Supplementary Information**

**Table S1:** Multi-Cox Regression in Cirrhosis Subclass of Train Cohort

| **Characteristics** | **Multivariate cox** | | | | |
| --- | --- | --- | --- | --- | --- |
| **HR** | **95%CI** | **SE** | **Z** | **P** |
|  |  |  |  |  |  |
| **Training Cohort without Cirrhosis (n=74)** | | |  |  |  |
| CP | 1.535 | 0.680 - 3.466 | 0.415 | 1.032 | 0.302 |
| number | 1.302 | 0.620 - 2.736 | 0.379 | 0.697 | 0.486 |
| lgDCP | 1.604 | 1.104 - 2.332 | 0.191 | 2.476 | 0.013* |
| ALT | 1.013 | 0.998 - 1.028 | 0.008 | 1.675 | 0.094 |
| AST | 0.998 | 0.986 - 1.010 | 0.006 | -0.270 | 0.787 |
| Albumin | 0.957 | 0.906 - 1.011 | 0.028 | -1.580 | 0.114 |
| **Training Cohort within Cirrhosis (n=73)** | | |  |  |  |
| number | 1.823 | 0.811 - 4.100 | 0.413 | 1.453 | 0.146 |
| size | 3.254 | 0.859 - 12.325 | 0.679 | 1.737 | 0.083 |
| lgAFP | 1.692 | 1.093 - 2.621 | 0.223 | 2.357 | 0.018* |
| lgDCP | 0.860 | 0.494 - 1.496 | 0.283 | -0.534 | 0.593 |
| ALT | 0.985 | 0.961 - 1.010 | 0.013 | -1.163 | 0.245 |
| AST | 1.016 | 0.999 - 1.033 | 0.009 | 1.807 | 0.071 |
| Albumin | 1.001 | 0.913 - 1.097 | 0.047 | 0.016 | 0.987 |
| Tbil | 1.012 | 1.004 - 1.020 | 0.004 | 2.839 | 0.004* |
|  |  |  |  |  |  |

**Abbreviations:** AFP, alpha-fetoprotein; DCP, des-γ-carboxyprothrombin; AST, alanine; AST, aspartate aminotransferase; PLT, Platelet Count; INR, International Normalized Ratio; IQR, Interquartile Range.

**Figure S1:** The calibration curves of the AD score at different time points (1 year, 2 years, 3 years).


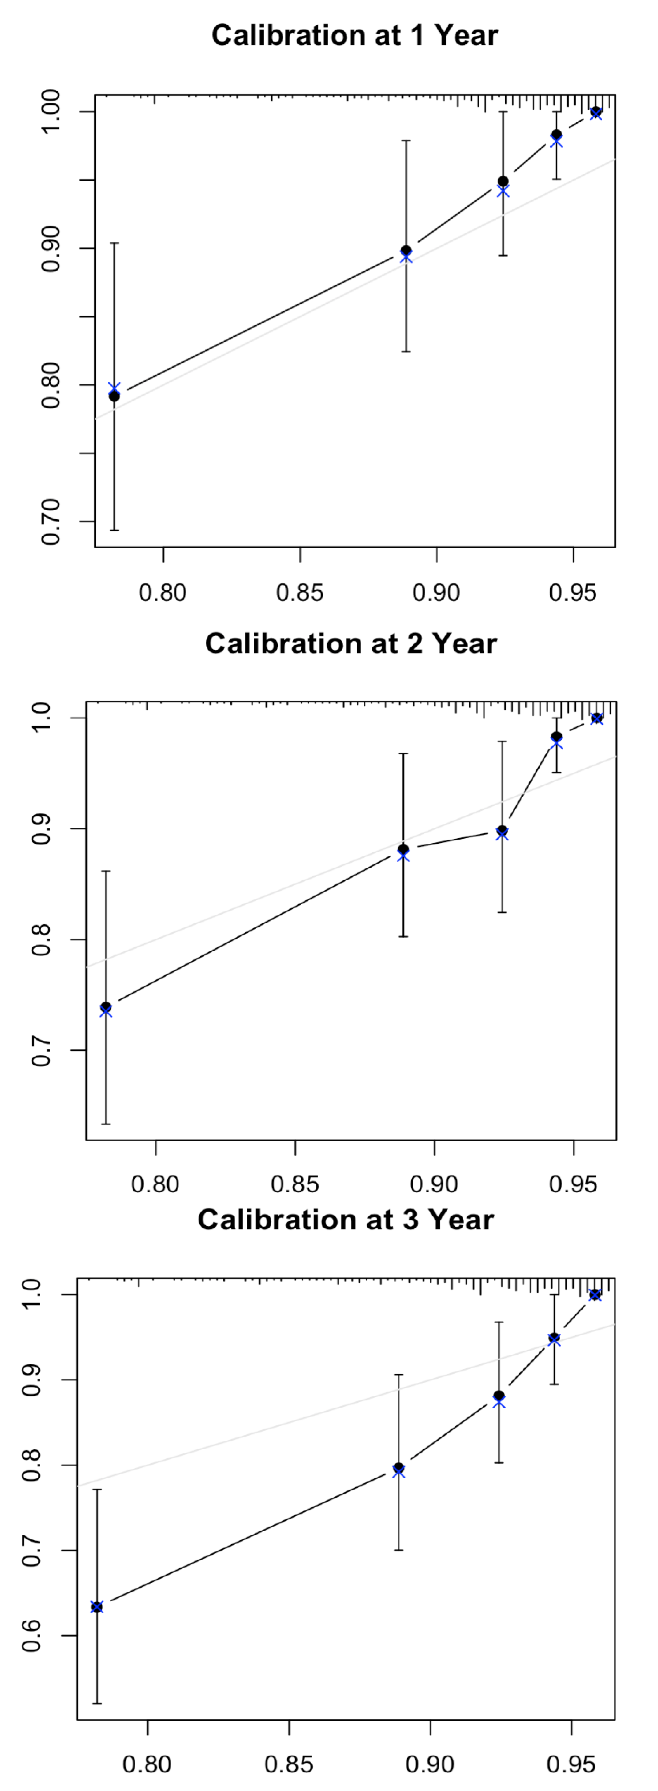


**The testing of tumor markers**

In our center, both AFP and DCP are measured using chemiluminescence assays. AFP is measured in ng/ml, with a cutoff value of less than or equal to 7 ng/ml. DCP is measured in mAU/ml, with a cutoff value of less than or equal to 40 mAU/ml. Both tumor markers are tested after patient admission and prior to the procedure to assess the patient's condition.
